# Supplementary material for: Function of pea amino acid permease AAP6 in nodule nitrogen metabolism and export, and plant nutrition
Source: PubMed Central journal article supplement (PMC6184819; doi:10.1093/jxb/ery289), 2018-08-03
Supplement: ery289_suppl_supplementary_materials.pdf [file ery289_suppl_supplementary_materials.pdf]

## Supplementary data

**Table S1.** Primers used for gene expression analysis by quantitative real time polymerase chain reaction (qRT-PCR). List of genes, gene accessions, primers and references.

| Gene                                                                   | Gene accessions of pea or legume homologs                                                                             | Primer sequences (5'-3')                                             | References                      |
|------------------------------------------------------------------------|-----------------------------------------------------------------------------------------------------------------------|----------------------------------------------------------------------|---------------------------------|
| <i>Amino acid permease 1 (AAP1)</i>                                    | AY956395                                                                                                              | For: GCTGGAACCATTACTGGAGTAAATGA<br>Rev: GACTCTGACGGTGGTGGTCTTTTAC    | Tegeder <i>et al.</i> , 2000    |
| <i>Amino acid permease 2 (AAP2)</i>                                    | AY956396                                                                                                              | For: AGCAAGCCACGAGGATAAGTATAGGC<br>Rev: CAGTGAGTAAGTTTCTGGCGATGTG    | Tegeder <i>et al.</i> , 2000    |
| <i>Amino acid permease 3 (AAP3)</i>                                    | KX620905                                                                                                              | For: CGTCACAGATTATTGAACATCAAGCA<br>Rev: GGGTCAAAATCACGGGTTGAAATAGA   | Tan <i>et al.</i> , 2010        |
| <i>Amino acid permease 6 (AAP6)</i>                                    | KX620908                                                                                                              | For: GTTAACAGGAGTGCAAGTTGGGGTGG<br>Rev: ATGATTGGTTCTCTGGAGGGCTTGA    | Dhandapani <i>et al.</i> , 2016 |
| <i>Cationic amino acid transporter 6 (CAT6)</i>                        | Partial clone (cf. Tan 2010)                                                                                          | For: GGTTCCGGAGTGTTCGGCTGTACG<br>Rev: TGAAACTTTGGTCCACTCTTTCTTTTGA   | Tan, 2010                       |
| <i>Asparagine synthetase 1 (AS1)</i>                                   | X52179                                                                                                                | For: CTGTCACTGCTAGATACCTTGCTGGT<br>Rev: GAGACATCAGAAACATAGGTGTTGCA   | Tsai and Coruzzi, 1990          |
| <i>Asparagine synthetase 2 (AS2)</i>                                   | X52180                                                                                                                | For: CCATCACTTCTCGCTACCTAGCAACC<br>Rev: TCGACATGAGAAACATAGGCGTGCTT   | Tsai and Coruzzi, 1990          |
| <i>L-Asparaginase (ASNase)</i>                                         | <i>Glycine max</i> ; AY096000<br><i>Arachis hypogaea</i> ; DQ889570<br><i>Phaseolus vulgaris</i> ; DQ300284           | For: GTYATGGAHAARTCYCCDCATTCTA<br>Rev: AMCARGATTGYDTTTCYCTCCTTTGC    | Tan <i>et al.</i> , 2010        |
| <i>Glutamate synthase-NADH dependent (GOGAT)</i>                       | <i>Phaseolus vulgaris</i> ; AF314925<br><i>Medicago sativa</i> ; L37606                                               | For: CACAGATTGCATWGGAACATCCATTC<br>Rev: CCATTTTCATCTCCCAMAAACCTCTTAG | Tan <i>et al.</i> , 2010        |
| <i>Glutamine synthetase 2, chloroplastic (GS2)</i>                     | M20664                                                                                                                | For: GAAAATGGCACCATCAATAGGGTAGAG<br>Rev: AGGGATGCGAAACAGGCTTTGATATG  | Tingey <i>et al.</i> , 1988     |
| <i>Ammonium facilitator 3 (AMF)</i>                                    | <i>Glycine max</i> ; Glyma08g06880<br><i>Medicago truncatula</i> ; Medtr2g010350<br><i>Pisum sativum</i> ; CD860511.1 | For: CTCGCCTCTTGTCCGAGTTGTCC<br>Rev: CGGTGGTTGTACTTGTCTCCTCTAC       | -                               |
| <i>Nodulin26-like intrinsic protein 1 (NIP1)</i>                       | AJ243308                                                                                                              | For: CACCGATAACAGAGCGATTGG<br>Rev: TCCATATTCCTCGATATTCATTGTG         | Shuurmans <i>et al.</i> , 2003  |
| <i>Elongation factor 1<math>\alpha</math> (EF1<math>\alpha</math>)</i> | X96555                                                                                                                | For: CAGTGGGACGTGTTGAAACTGGTGTT<br>Rev: ATCGAACATTGTCTCCTGGAAGAGCC   | Cong <i>et al.</i> , 2000       |
| <i>Ubiquitin (Ubi)</i>                                                 | L81139, L81140, L81141, L81142                                                                                        | For: GGCAAAAATACAGGACAAGGAGGGAA<br>Rev: CGCAAMACHAGGTGRAGAGTRGACTC   | Xia and Mahon, 1998             |

Cong X, Ling S, Zhu Y. 2000. Cloning, sequencing and structural analysis of a pea cDNA encoding EF-1 $\alpha$ . Chinese Science Bulletin 45, 338-343.

- Dhandapani P, Song J, Novak O, Jameson PE.** 2017. Infection by *Rhodococcus fascians* maintains cotyledons as a sink tissue for the pathogen. *Annals of Botany* **119**, 841-852.
- Kawashima K, Suganuma N, Tamaoki M, Kouchi H.** 2001. Two types of pea leghemoglobin genes showing different O<sub>2</sub>-binding affinities and distinct patterns of spatial expression in nodules. *Plant Physiology* **125**, 641-651.
- Schuurmans JA, van Dongen JT, Rutjens BP, Boonman A, Pieterse CM, Borstlap AC.** 2003. Members of the aquaporin family in the developing pea seed coat include representatives of the PIP, TIP, and NIP subfamilies. *Plant Molecular Biology* **53**, 655-667.
- Tan QM.** 2010. Understanding the physiological importance of amino acid transport in legumes. Doctoral dissertation, Washington State University.
- Tan QM, Zhang LZ, Grant J, Cooper P, Tegeder M.** 2010. Increased phloem transport of S-methylmethionine positively affects sulfur and nitrogen metabolism and seed development in pea plants. *Plant Physiology* **154**, 1886-1896.
- Tegeder M, Offler CE, Frommer WB, Patrick JW.** (2000) Amino acid transporters are localized to transfer cells of developing pea seeds. *Plant Physiology* **122**, 319-326.
- Tingey S, Tsai FY, Edwards JW, Walker EL, Coruzzi GM.** 1988. Chloroplast and cytosolic glutamine synthetase are encoded by homologous nuclear genes which are differentially expressed in vivo. *Journal of Biological Chemistry* **263**, 9651-9657.
- Tsai FY, Coruzzi GM.** 1990. Dark-induced and organ-specific expression of two asparagine synthetase genes in *Pisum sativum*. *The EMBO Journal* **9**, 323-332.
- Xia X, Mahon J.** 1998. Pea polyubiquitin genes:(I) Structure and genomic organization. *Gene* **215**, 445-452.

**Table S2.** Concentrations and spectrum of free amino acids in the xylem and roots of nodulated *PsAAP6*-miR plants. Data are presented as means with standard deviation ( $\pm$  SD). Significant differences are indicated by asterisks (Student's *t*-test; \*,  $p < 0.05$ ; \*\*,  $p < 0.001$ ). Values for  $\% \Delta$  describe the percentage change between *PsAAP6*-miR and *GFP*-miR control plants.

| Amino acids  | Xylem ( $\mu$ M)                          |                                           |             | Root (nmol/mg DW)                  |                                     |             |
|--------------|-------------------------------------------|-------------------------------------------|-------------|------------------------------------|-------------------------------------|-------------|
|              | <i>GFP</i> -miR                           | <i>AAP6</i> -miR                          | $\% \Delta$ | <i>GFP</i> -miR                    | <i>AAP6</i> -miR                    | $\% \Delta$ |
| Ala          | 38.05 $\pm$ 5.14                          | 46.75 $\pm$ 10.10                         |             | 0.60 $\pm$ 0.11                    | 0.49 $\pm$ 0.08                     |             |
| Arg          | 188.24 $\pm$ 12.10                        | 167.47 $\pm$ 16.37*                       | -11         | 1.42 $\pm$ 0.25                    | 1.08 $\pm$ 0.14*                    | -24         |
| <b>Asn</b>   | <b>11543.22 <math>\pm</math> 987.22</b>   | <b>8352.38 <math>\pm</math> 2648.52*</b>  | <b>-28</b>  | <b>12.13 <math>\pm</math> 2.50</b> | <b>7.62 <math>\pm</math> 0.91*</b>  | <b>-37</b>  |
| Asp          | 3153.10 $\pm$ 380.06                      | 2773.79 $\pm$ 519.33                      |             | 1.93 $\pm$ 0.84                    | 1.32 $\pm$ 0.23                     |             |
| Cys          | 7.58 $\pm$ 1.03                           | 8.37 $\pm$ 1.24                           |             | ND                                 | ND                                  |             |
| Glu          | 199.81 $\pm$ 32.39                        | 160.12 $\pm$ 12.93*                       | -20         | 4.14 $\pm$ 0.91                    | 2.69 $\pm$ 0.68*                    | -35         |
| Gln          | 3993.25 $\pm$ 508.25                      | 3110.05 $\pm$ 787.87*                     | -22         | 4.48 $\pm$ 1.08                    | 3.47 $\pm$ 0.80*                    | -23         |
| Gly          | 16.19 $\pm$ 4.44                          | 16.30 $\pm$ 2.45                          |             | 0.69 $\pm$ 0.08                    | 0.75 $\pm$ 0.01                     |             |
| His          | 79.35 $\pm$ 17.21                         | 60.81 $\pm$ 23.37                         |             | 0.19 $\pm$ 0.03                    | 0.19 $\pm$ 0.02                     |             |
| Hse          | 991.85 $\pm$ 81.14                        | 860.34 $\pm$ 244.88                       |             | 10.87 $\pm$ 2.79                   | 5.12 $\pm$ 0.28*                    | -53         |
| Ile          | 37.58 $\pm$ 4.57                          | 42.88 $\pm$ 8.92                          |             | 0.20 $\pm$ 0.04                    | 0.18 $\pm$ 0.03                     |             |
| Leu          | 42.19 $\pm$ 8.95                          | 48.83 $\pm$ 13.64                         |             | 0.23 $\pm$ 0.04                    | 0.22 $\pm$ 0.04                     |             |
| Lys          | 64.10 $\pm$ 15.71                         | 73.80 $\pm$ 22.47                         |             | 0.37 $\pm$ 0.08                    | 0.35 $\pm$ 0.06                     |             |
| Met          | 0.46 $\pm$ 0.26                           | 0.55 $\pm$ 0.17                           |             | 0.07 $\pm$ 0.01                    | 0.05 $\pm$ 0.01*                    | -17         |
| Phe          | 26.30 $\pm$ 6.47                          | 23.38 $\pm$ 4.12                          |             | 0.29 $\pm$ 0.01                    | 0.27 $\pm$ 0.01*                    | -7          |
| Pro          | 9.69 $\pm$ 2.55                           | 10.73 $\pm$ 2.85                          |             | 0.11 $\pm$ 0.02                    | 0.11 $\pm$ 0.01                     |             |
| Ser          | 33.10 $\pm$ 10.93                         | 31.95 $\pm$ 3.69                          |             | 0.71 $\pm$ 0.14                    | 0.75 $\pm$ 0.14                     |             |
| Thr          | 71.64 $\pm$ 9.04                          | 70.66 $\pm$ 21.18                         |             | 0.88 $\pm$ 0.13                    | 0.74 $\pm$ 0.10*                    | -16         |
| Tyr          | 12.02 $\pm$ 2.76                          | 9.12 $\pm$ 2.43                           |             | 0.61 $\pm$ 0.40                    | 0.65 $\pm$ 0.39                     |             |
| Val          | 85.12 $\pm$ 16.91                         | 86.98 $\pm$ 17.09                         |             | 0.55 $\pm$ 0.07                    | 0.53 $\pm$ 0.06                     |             |
| <b>Total</b> | <b>21323.571 <math>\pm</math> 1201.81</b> | <b>17327.23 <math>\pm</math> 2549.27*</b> | <b>-19</b>  | <b>41.42 <math>\pm</math> 7.47</b> | <b>28.49 <math>\pm</math> 2.93*</b> | <b>-31</b>  |

**Table S3.** Concentrations and spectrum of free amino acids in the stem and leaves of nodulated *PsAAP6*-miR plants. Data are presented as means with standard deviation ( $\pm$  SD). Significant differences are indicated by asterisks (Student's *t*-test; \*,  $p < 0.05$ ; \*\*,  $p < 0.001$ ). Values for % $\Delta$  describe the percentage change between *PsAAP6*-miR and *GFP*-miR control plants.

| Amino acids  | Stem (nmol/mg DW)                   |                                     |            | Leaf (nmol/mg DW)                  |                                     |            |
|--------------|-------------------------------------|-------------------------------------|------------|------------------------------------|-------------------------------------|------------|
|              | <i>GFP</i> -miR                     | <i>AAP6</i> -miR                    | % $\Delta$ | <i>GFP</i> -miR                    | <i>AAP6</i> -miR                    | % $\Delta$ |
| Ala          | 3.49 $\pm$ 0.87                     | 2.82 $\pm$ 0.54                     |            | 3.35 $\pm$ 0.51                    | 1.16 $\pm$ 0.4**                    | -65        |
| Asn          | 13.15 $\pm$ 2.39                    | 12.85 $\pm$ 1.85                    |            | 0.35 $\pm$ 0.16                    | 0.19 $\pm$ 0.06*                    | -45        |
| Asp          | 2.43 $\pm$ 0.36                     | 2.21 $\pm$ 0.51                     |            | 2.66 $\pm$ 0.22                    | 1.09 $\pm$ 0.36**                   | -59        |
| Cys          | 0.02 $\pm$ 0.01                     | 0.02 $\pm$ 0.01                     |            | 0.25 $\pm$ 0.08                    | 0.93 $\pm$ 0.65*                    | 270        |
| Glu          | 12.1 $\pm$ 2.42                     | 9.83 $\pm$ 1.64                     |            | 13.18 $\pm$ 2.18                   | 4.99 $\pm$ 2.08**                   | -62        |
| Gln          | 3.76 $\pm$ 1.55                     | 3.18 $\pm$ 0.98                     |            | 0.90 $\pm$ 0.42                    | 0.30 $\pm$ 0.10**                   | -66        |
| Gly          | 0.82 $\pm$ 0.37                     | 0.71 $\pm$ 0.36                     |            | 2.84 $\pm$ 0.51                    | 1.01 $\pm$ 0.47**                   | -64        |
| His          | 0.30 $\pm$ 0.11                     | 0.05 $\pm$ 0.02*                    | -41        | 0.15 $\pm$ 0.04                    | 0.05 $\pm$ 0.02**                   | -69        |
| Hse          | 7.73 $\pm$ 2.94                     | 3.75 $\pm$ 1.09*                    | -51        | 1.98 $\pm$ 0.66                    | 0.72 $\pm$ 0.04*                    | -63        |
| Ile          | 0.51 $\pm$ 0.15                     | 0.33 $\pm$ 0.06*                    | -35        | 0.20 $\pm$ 0.06                    | 0.05 $\pm$ 0.02**                   | -73        |
| Leu          | 0.304 $\pm$ 0.11                    | 0.20 $\pm$ 0.06*                    | -34        | 0.19 $\pm$ 0.06                    | 0.07 $\pm$ 0.04*                    | -60        |
| Lys          | 0.47 $\pm$ 0.12                     | 0.44 $\pm$ 0.08                     |            | 0.27 $\pm$ 0.05                    | 0.15 $\pm$ 0.05*                    | -45        |
| Phe          | 0.34 $\pm$ 0.04                     | 0.26 $\pm$ 0.02*                    | -24        | 0.73 $\pm$ 0.11                    | 0.23 $\pm$ 0.10**                   | -68        |
| Pro          | 4.36 $\pm$ 3.36                     | 0.59 $\pm$ 0.43*                    | -86        | 1.23 $\pm$ 0.47                    | 0.38 $\pm$ 0.18*                    | -70        |
| Ser          | 2.08 $\pm$ 0.79                     | 1.74 $\pm$ 0.43                     |            | 1.22 $\pm$ 0.42                    | 0.52 $\pm$ 0.15*                    | -58        |
| Thr          | 1.69 $\pm$ 0.47                     | 1.09 $\pm$ 0.27*                    | -36        | 1.08 $\pm$ 0.25                    | 0.33 $\pm$ 0.15**                   | -69        |
| Tyr          | 0.03 $\pm$ 0.01                     | 0.07 $\pm$ 0.05                     |            | 1.49 $\pm$ 0.14                    | 0.68 $\pm$ 0.48*                    | -54        |
| Val          | 0.90 $\pm$ 0.18                     | 0.67 $\pm$ 0.20                     |            | 0.43 $\pm$ 0.06                    | 0.15 $\pm$ 0.05**                   | -65        |
| <b>Total</b> | <b>56.15 <math>\pm</math> 15.39</b> | <b>43.55 <math>\pm</math> 6.86*</b> | <b>-22</b> | <b>32.96 <math>\pm</math> 8.52</b> | <b>16.15 <math>\pm</math> 7.30*</b> | <b>-51</b> |

**Fig. S1.** Comparison of pea and Arabidopsis amino acid transporter cDNA sequences. For gene accessions see Table S1 and <http://aramemnon.uni-koeln.de/>.

|               | <i>PsAAP6</i> | <i>PsAAP1</i> | <i>PsAAP2</i> | <i>PsAAP3</i> | <i>PsCAT6</i> | <i>AtAAP1</i> | <i>AtAAP2</i> | <i>AtAAP3</i> | <i>AtAAP4</i> | <i>AtAAP5</i> | <i>AtAAP6</i> | <i>AtAAP7</i> | <i>AtAAP8</i> |
|---------------|---------------|---------------|---------------|---------------|---------------|---------------|---------------|---------------|---------------|---------------|---------------|---------------|---------------|
| <i>PsAAP6</i> | <b>100</b>    | 60.9          | 56.4          | 56.4          | 43            | 65.6          | 59.7          | 62.2          | 60.1          | 60.3          | 71.8          | 57.9          | 64.4          |
| <i>PsAAP1</i> | 60.9          | <b>100</b>    | 60.4          | 63.6          | 43.3          | 59.2          | 68.4          | 68.5          | 65            | 66.9          | 61.8          | 58.6          | 58.7          |
| <i>PsAAP2</i> | 56.4          | 60.4          | <b>100</b>    | 65.7          | 39.1          | 53.8          | 60.4          | 61.4          | 62.6          | 59.1          | 56.4          | 52.5          | 53.2          |
| <i>PsAAP3</i> | 56.4          | 63.6          | 65.7          | <b>100</b>    | 45            | 55.8          | 64.3          | 61.5          | 60.7          | 59.1          | 57            | 51.5          | 54.2          |
| <i>PsCAT6</i> | 43            | 43.3          | 39.1          | 45            | <b>100</b>    | 44.6          | 42.4          | 43.4          | 38.9          | 41.8          | 40.4          | 41.8          | 42.1          |
| <i>AtAAP1</i> | 65.6          | 59.2          | 53.8          | 55.8          | 44.6          | <b>100</b>    | 59.9          | 60.7          | 59.3          | 59.7          | 69.7          | 55.6          | 74.5          |
| <i>AtAAP2</i> | 59.7          | 68.4          | 60.4          | 64.3          | 42.4          | 59.9          | <b>100</b>    | 68.8          | 77.5          | 64.9          | 59.5          | 55.7          | 58.3          |
| <i>AtAAP3</i> | 62.2          | 68.5          | 61.4          | 61.5          | 43.4          | 60.7          | 68.8          | <b>100</b>    | 68.7          | 68.9          | 63            | 59.8          | 62.2          |
| <i>AtAAP4</i> | 60.1          | 65            | 62.6          | 60.7          | 38.9          | 59.3          | 77.5          | 68.7          | <b>100</b>    | 63.5          | 60.2          | 54.6          | 59.4          |
| <i>AtAAP5</i> | 60.3          | 64.9          | 59.1          | 59.1          | 41.8          | 59.7          | 64.9          | 68.9          | 63.5          | <b>100</b>    | 61.5          | 55.9          | 60            |
| <i>AtAAP6</i> | 71.8          | 61.8          | 56.4          | 57            | 40.4          | 69.7          | 59.5          | 63            | 60.2          | 61.5          | <b>100</b>    | 56.7          | 66.1          |
| <i>AtAAP7</i> | 57.9          | 58.6          | 52.5          | 51.5          | 41.8          | 55.6          | 55.7          | 59.8          | 54.6          | 55.9          | 56.7          | <b>100</b>    | 58.4          |
| <i>AtAAP8</i> | 64.4          | 58.7          | 53.2          | 54.2          | 42.1          | 74.5          | 58.3          | 62.2          | 59.4          | 60            | 66.1          | 58.4          | <b>100</b>    |



**Fig. S3.** Alignment of *PsAAP6* amiRNA sequence with pea *AAP* and *CAT6* sequences. Mismatches are marked yellow.

GGCGCGTGCTGTAAGGACAT - **PsAAP6** miRNA 'targeting' coding sequence  
 GGAGCGTGCTGTATGGACAT - **PsAAP6** sequence targeted  
 20 nucleotides (nt) – 2nt mismatches

GGCG\_CGTGCTGTAAGGACAT - **PsAAP6** miRNA 'targeting' coding sequence  
 GGATACGCAGCGTTTGGAAAT - **PsAAP1** sequence  
 10nt mismatches (50% difference)

GGCGC\_GTGCTGTAAGGACAT - **PsAAP6** miRNA 'targeting' coding sequence  
 GGAGCAGTTGGGTTTTGGCCT - **PsAAP2** sequence:  
 10nt mismatches (50% difference)

GGCGCGTGCTGTAAGGACAT - **PsAAP6** miRNA 'targeting' coding sequence  
 GGGAGTTTCCAAGGTCTT - **PsAAP3** sequence  
 10nt mismatches (50% difference)

GGCGCGTGCTGTA\_AGGACAT - **PsAAP6** miRNA 'targeting' coding sequence:  
 GGAGAGTTCAGTGGTGAATAT - **PsCAT6** sequence:  
 9nt mismatches (45% difference)
